# Supplementary material for: The Association of Health Literacy with Intention to Vaccinate and Vaccination Status: A Systematic Review
Source: MDPI journal article supplement (doi:10.3390/vaccines10111832), 2022-10-29
Supplement: s1 [file s1]

## SUPPLEMENTARY MATERIAL

Supplementary Table S1. Search strategies used in the systematic review.

|                                                                                                                                                                                      |                |
|--------------------------------------------------------------------------------------------------------------------------------------------------------------------------------------|----------------|
| ("health" AND "literacy") OR ("health literacy" OR "health literacy[MeSH Terms]") AND ("vaccin*" OR "immuniz*" OR "immunis*" OR "vaccination[MeSH Terms]" OR "vaccines[MeSH Terms]") | PubMed         |
| ("health" AND "literacy") OR ("health literacy") AND ("vaccin*" OR "immunis*" OR "immuniz*")                                                                                         | Scopus         |
| ("health" AND "literacy") OR ("health literacy") AND ("vaccin*" OR "immuniz*" OR "immunis*")                                                                                         | Web of Science |

Supplementary Table S2. Quality assessment of the articles included in the systematic review according to the Newcastle-Ottawa scale for cohort and case-control studies and its adapted version for cross-sectional studies.

| First author, year       | Selection |   |   |   | Comparability | Outcome |   |   | Overall |
|--------------------------|-----------|---|---|---|---------------|---------|---|---|---------|
| Patil, 2021              | 1         | 1 | 0 | 2 | 2             | 1       | 1 | - | 8       |
| Montagni, 2021           | 1         | 0 | 0 | 1 | 2             | 1       | 1 | - | 6       |
| Longchamps, 2021         | 1         | 0 | 0 | 2 | 2             | 1       | 1 | - | 7       |
| Fukuda, 2021             | 1         | 1 | 1 | 2 | 2             | 1       | 1 | - | 9       |
| Arvanitis, 2021          | 1         | 0 | 1 | 2 | 2             | 1       | 1 | - | 8       |
| Aslantekin-Özçoban, 2021 | 1         | 1 | 0 | 2 | 2             | 1       | 1 | - | 8       |
| Scott, 2002              | 1         | 1 | 0 | 2 | 2             | 1       | 1 | - | 8       |
| Howard, 2006             | 1         | 1 | 1 | 1 | 2             | 0       | 1 | 1 | 8       |
| White, 2008              | 1         | 1 | 1 | 2 | 1             | 1       | 1 | - | 8       |
| Bennett, 2009            | 1         | 1 | 1 | 2 | 2             | 1       | 1 | - | 9       |
| Pati, 2010               | 1         | 1 | 1 | 1 | 2             | 1       | 1 | 1 | 9       |
| Pati, 2017               | 0         | 1 | 1 | 1 | 2             | 1       | 1 | 1 | 8       |
| Amit Aharon, 2016        | 1         | 0 | 0 | 1 | 2             | 2       | 1 | - | 7       |
| Moran, 2016              | 0         | 0 | 1 | 2 | 2             | 1       | 1 | - | 7       |
| Widdice, 2018            | 0         | 0 | 1 | 2 | 2             | 2       | 1 | - | 8       |
| Castro-Sánchez, 2018     | 1         | 1 | 1 | 2 | 1             | 2       | 1 | - | 9       |
| O'Connor, 2019           | 1         | 1 | 1 | 0 | 2             | 1       | 1 | 1 | 8       |
| Omar, 2020               | 1         | 1 | 1 | 2 | 2             | 2       | 1 | - | 10      |
| Lorini, 2020             | 1         | 0 | 0 | 1 | 2             | 1       | 1 | - | 6       |
| Rafferty, 2019           | 1         | 1 | 0 | 2 | 2             | 1       | 1 | - | 8       |
| Song, 2018               | 1         | 0 | 0 | 1 | 2             | 1       | 1 | - | 6       |
